# Supplementary material for: Regulating the electronic and magnetic properties of 1T′-ReS2 by fabricating nanoribbons and transition-metal doping: a theoretical study
Source: Royal Society of Chemistry journal article supplement (doi:10.1039/d2nr00488g), 2022-01-01
Supplement: d2nr00488g1.pdf [file d2nr00488g1.pdf]

## Electronic Supplementary Information

### Regulating electronic and magnetic properties of 1T'-ReS<sub>2</sub> by fabricating nanoribbons and transition-metal doping: A theoretical study

Simei Li,<sup>a</sup> Shuqing Zhang,<sup>b</sup> and Ruiqi Zhao<sup>a\*</sup>

<sup>a</sup>Henan Key Laboratory of Deep-Earth Materials Science and Technology, School of Material Science and Engineering, Henan Polytechnic University, Henan 454003, China

<sup>b</sup>Institute of Information Photonics Technology, Faculty of Science, Beijing University of Technology, Beijing 100124, China

\*Correspondence to whom addressed. Email: zhaoruiqi@hpu.edu.cn.

#### Contents:

1. Width and vacuum of zigzag 1T'-ReS<sub>2</sub> nanoribbons.
2. Lattice parameter and the calculated chemical potentials of the transition metals.
3. Band structures and density of states of monolayer 1T'-ReS<sub>2</sub>.
4. Bond lengths and bond angles of both edge Re/TM and S or Re atoms.
5. The partial density of states contributed by specific elements in 1T'-ReS<sub>2</sub> nanoribbons.
6. The partial density of states in Mo-, W-, Os-, and Pt-doped a-NRs-S.
7. The partial density of states in pristine, Ni-, Pd-, Co-, Rh-, Ir-, Cu-, Ag-, and Au-doped a-NRs-S.
8. The partial density of states in Cr-, Ni-, Pd- and Pt- doped b-NRs-S.
9. Bader charge analysis of atoms around doping sites in pristine and TM-doped a-NRs-S nanoribbons.

## 1. Width and vacuum of zigzag 1T'-ReS<sub>2</sub> nanoribbons.

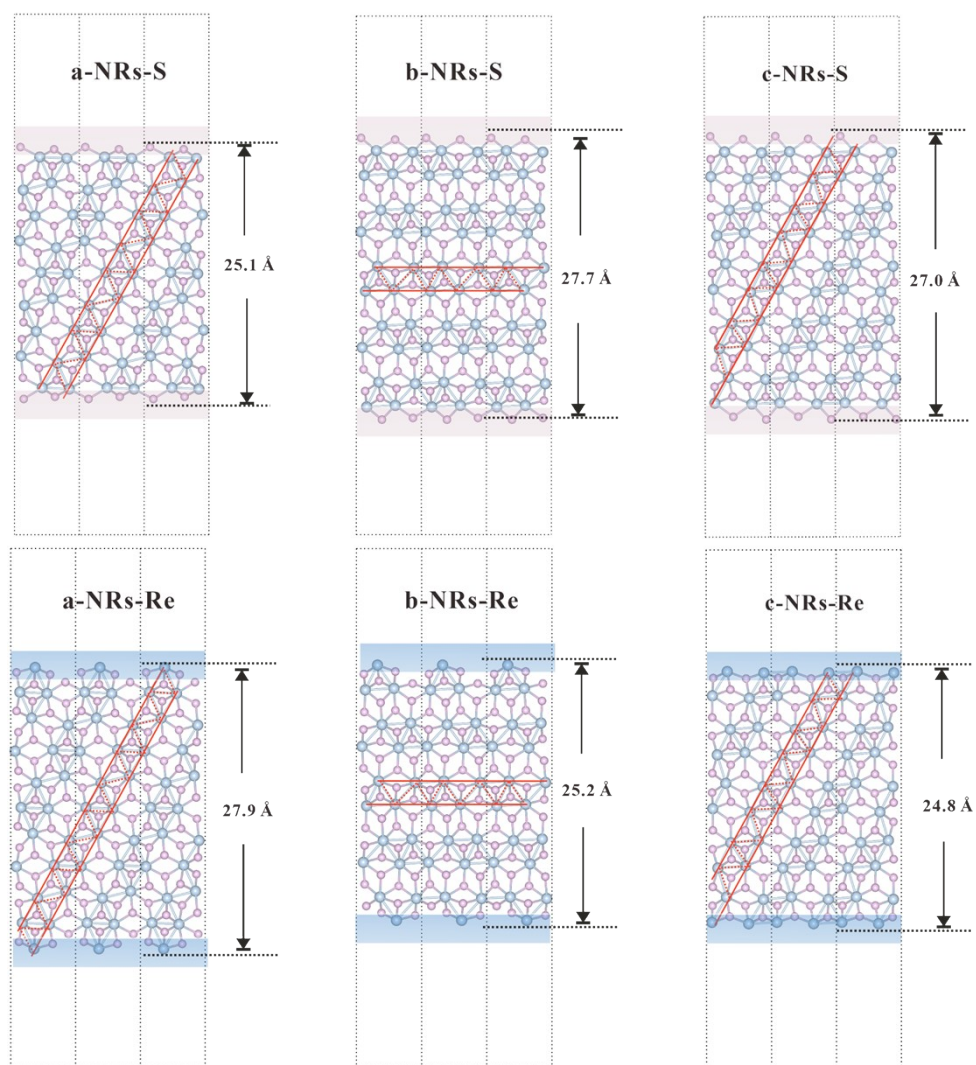

**Figure S1** Detailed information of 1T'-ReS<sub>2</sub> nanoribbons (Re, blue ball; S, pink ball) constructed along a, b and c directions shown in Fig. 1a. The diamond-shaped chains consisting with Re<sub>4</sub> clusters are also shown with dashed lines to highlight the symmetry features in 1T'-ReS<sub>2</sub> nanoribbons.

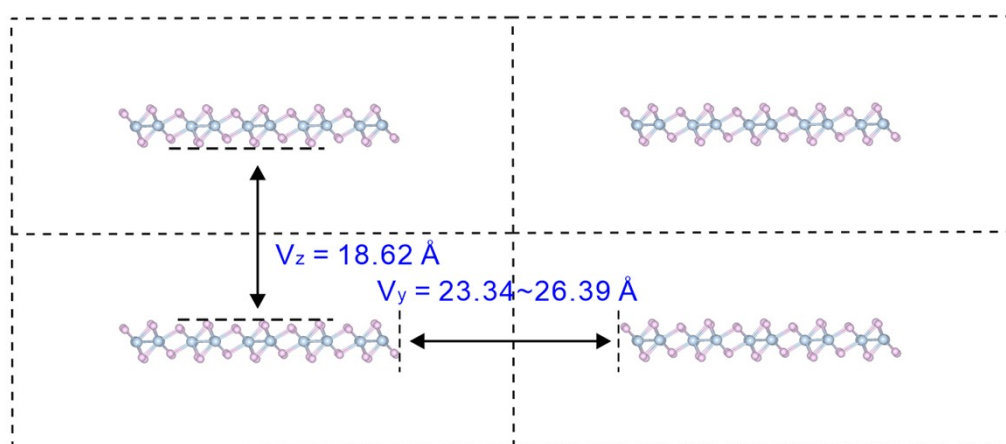

**Figure S2** Vacuum of zigzag 1T'-ReS<sub>2</sub>NRs (b-NRs-S) along y and z directions.



## 2. Lattice parameter and the calculated chemical potentials of the transition metals.

**Table S1** Lattice parameters and the calculated chemical potentials ( $\mu$ ) of transition metals.

| TM*       | a/Å         | b/Å         | c/Å         | $\mu$ /eV     |
|-----------|-------------|-------------|-------------|---------------|
| Cr        | 2.87        | 2.87        | 2.87        | -9.65         |
| Mo        | 2.74        | 2.74        | 2.74        | -10.85        |
| W         | 2.76        | 2.76        | 2.76        | -12.96        |
| Mn        | 7.46        | 7.46        | 7.46        | -9.16         |
| <b>Re</b> | <b>2.79</b> | <b>2.79</b> | <b>8.97</b> | <b>-12.44</b> |
| Fe        | 2.46        | 2.46        | 2.46        | -8.47         |
| Ru        | 2.73        | 2.73        | 4.31        | -9.27         |
| Os        | 2.76        | 2.76        | 4.36        | -11.23        |
| Co        | 2.50        | 2.50        | 4.03        | -7.11         |
| Rh        | 2.72        | 2.72        | 2.72        | -7.36         |
| Ir        | 2.74        | 2.74        | 2.74        | -8.84         |
| Ni        | 2.48        | 2.48        | 2.48        | -5.78         |
| Pd        | 2.80        | 2.80        | 2.80        | -5.18         |
| Pt        | 2.81        | 2.81        | 2.81        | -6.07         |
| Cu        | 2.56        | 2.56        | 2.56        | -4.10         |
| Ag        | 2.94        | 2.94        | 2.94        | -2.83         |
| Au        | 2.95        | 2.95        | 2.95        | -3.27         |

\*Note: The lattice parameters of the transition metals are taken from <https://materialsproject.org/>.

### 3. Band structures and density of states of monolayer 1T'-ReS<sub>2</sub>.

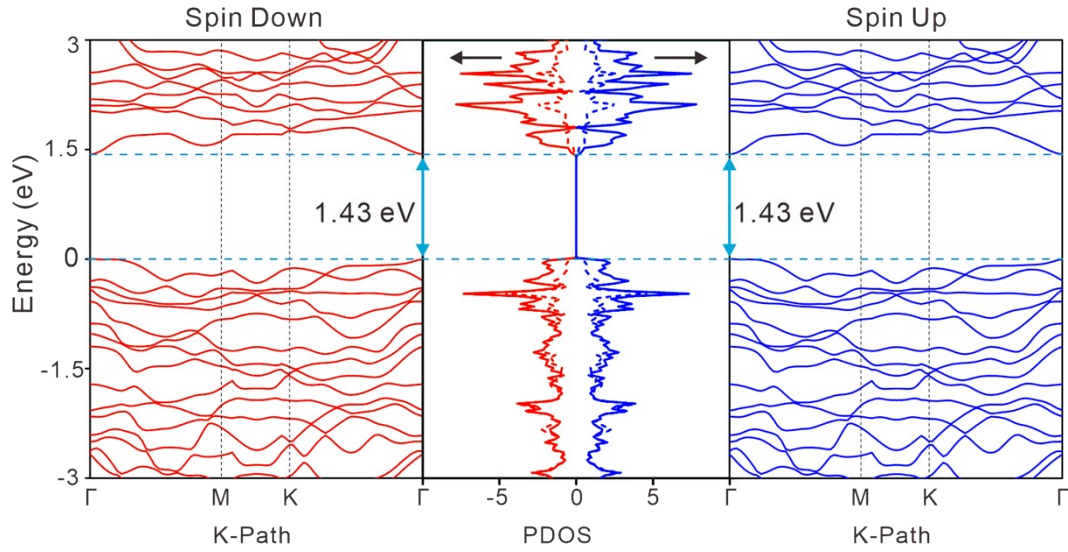

**Figure S3** Band structures and density of states of monolayer 1T'-ReS<sub>2</sub>. The direct bandgap is also presented for reference. The solid and dashed lines in PDOS represent electron density distributions of Re and S, respectively. Red and blue lines indicate spin down and spin up, respectively.

### 4. Local structures of a-NRS-S and b-NRS-S before/after doping TM atom of Cr, Mo and Co.

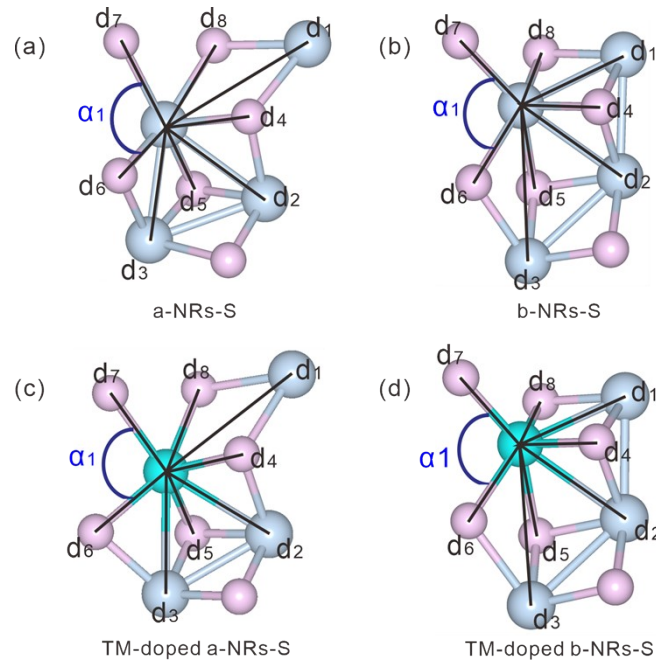

**Figure S4** Local structure and parameters describing variations as TM (TM = Cr, Mn, and Co) atom is introduced in a-NRs-S (a) and b-NRs-S (b). The TM atom is highlighted with green in (c) and (d).

**Table S2** Nanoribbons, bond lengths and bond angles before/after Cr, Mn and Co are introduced.

| Nanoribbons | $\alpha_{1/p}$ | $d_1/\text{\AA}$ | $d_2/\text{\AA}$ | $d_3/\text{\AA}$ | $d_4/\text{\AA}$ | $d_5/\text{\AA}$ | $d_6/\text{\AA}$ | $d_7/\text{\AA}$ | $d_8/\text{\AA}$ |
|-------------|----------------|------------------|------------------|------------------|------------------|------------------|------------------|------------------|------------------|
| a-NRs-S     | 81.14          | 3.79             | 2.87             | 2.68             | 2.43             | 2.40             | 2.47             | 2.38             | 2.46             |
| Cr-doped    | 86.72          | 3.62             | 2.73             | 2.79             | 2.23             | 2.26             | 2.28             | 2.35             | 2.40             |
| Mn-doped    | 86.65          | 3.58             | 2.73             | 2.81             | 2.27             | 2.26             | 2.30             | 2.32             | 2.35             |
| Co-doped    | 86.49          | 3.56             | 2.70             | 2.82             | 2.22             | 2.25             | 2.30             | 2.22             | 2.23             |
| b-NRs-S     | 89.33          | 2.71             | 2.83             | 3.61             | 2.29             | 2.43             | 2.40             | 2.29             | 2.36             |
| Cr-doped    | 90.63          | 2.66             | 2.87             | 3.67             | 2.22             | 2.44             | 2.33             | 2.20             | 2.27             |
| Mn-doped    | 88.78          | 2.64             | 2.76             | 3.62             | 2.19             | 2.32             | 2.29             | 2.23             | 2.26             |
| Co-doped    | 88.35          | 2.62             | 2.70             | 3.56             | 2.23             | 2.26             | 2.30             | 2.26             | 2.24             |

### 5. The partial density of states contributed by specific elements in 1T'-ReS<sub>2</sub> nanoribbons.

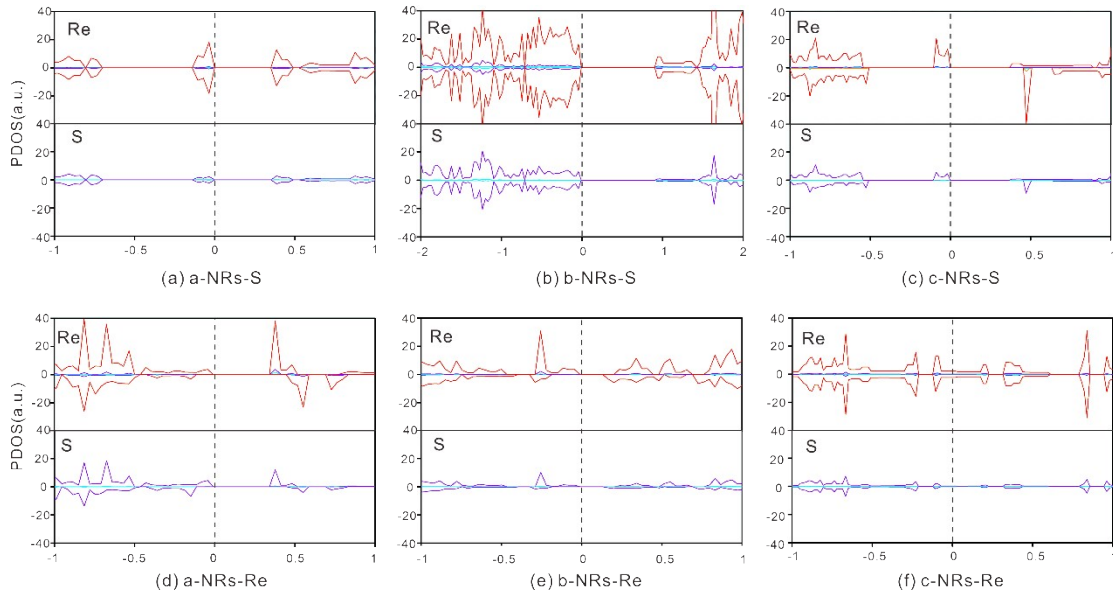

**Figure S5** The partial density of states on specific orbitals contributed by composed elements in 1T'-ReS<sub>2</sub> nanoribbons. The lines blue, purple and red represent s, p and d orbitals, respectively.



## 6. The partial density of states in Mo-, W-, Os-, and Pt-doped a-NRs-S.

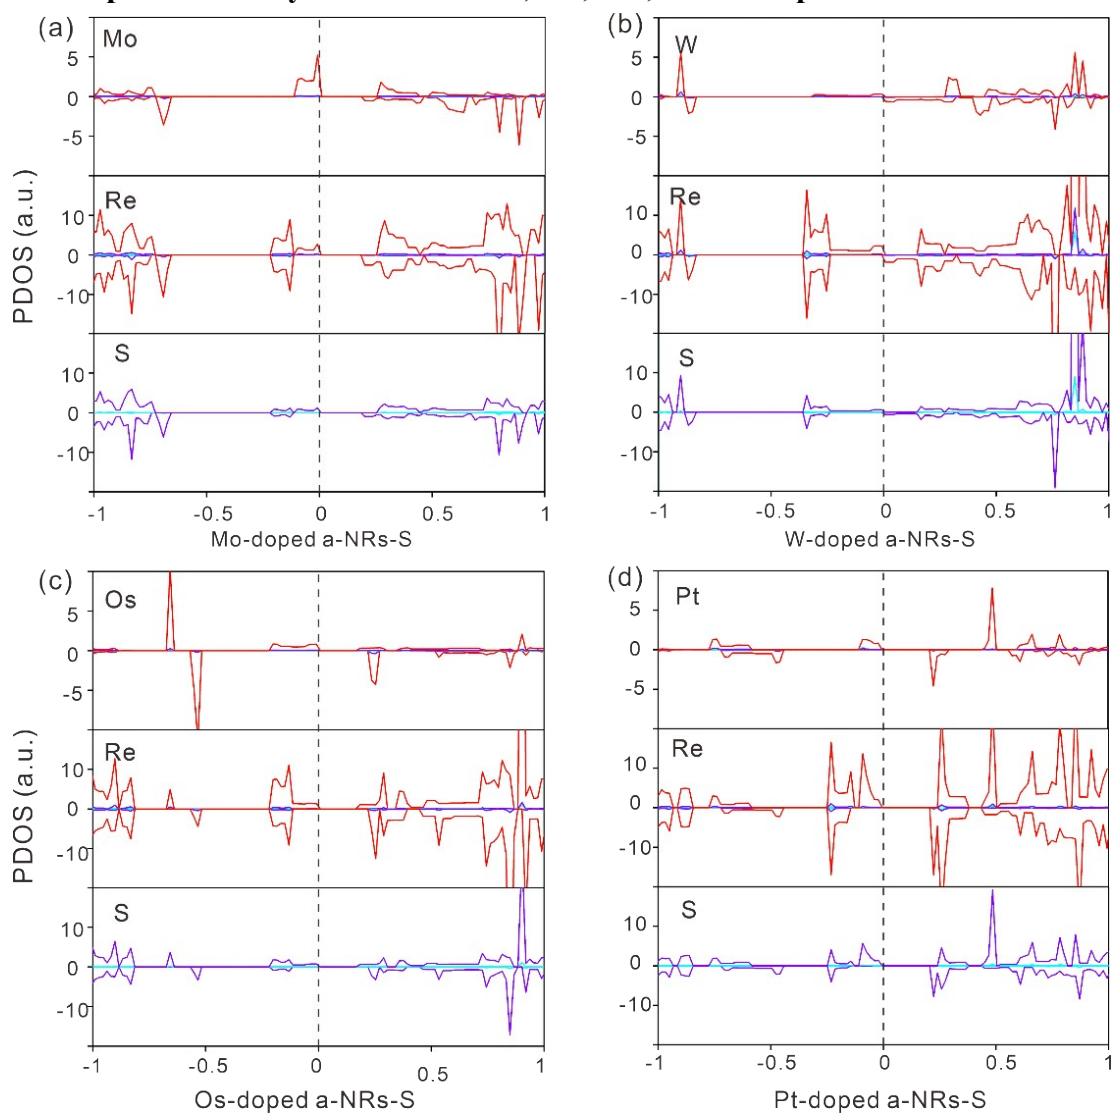

**Figure S6** The partial density of states on specific orbitals in Mo-, W-, Os-, and Pt-doped a-NRs-S with magnetism. The asymmetric PDOS distributions indicate magnetism can be introduced in these TM-doped nanoribbons. The lines blue, purple and red represent s, p and d orbitals, respectively.



## 7. The partial density of states in pristine, Ni-, Pd-, Co-, Rh-, Ir-, Cu-, Ag-, and Au-doped a-NRs-S.

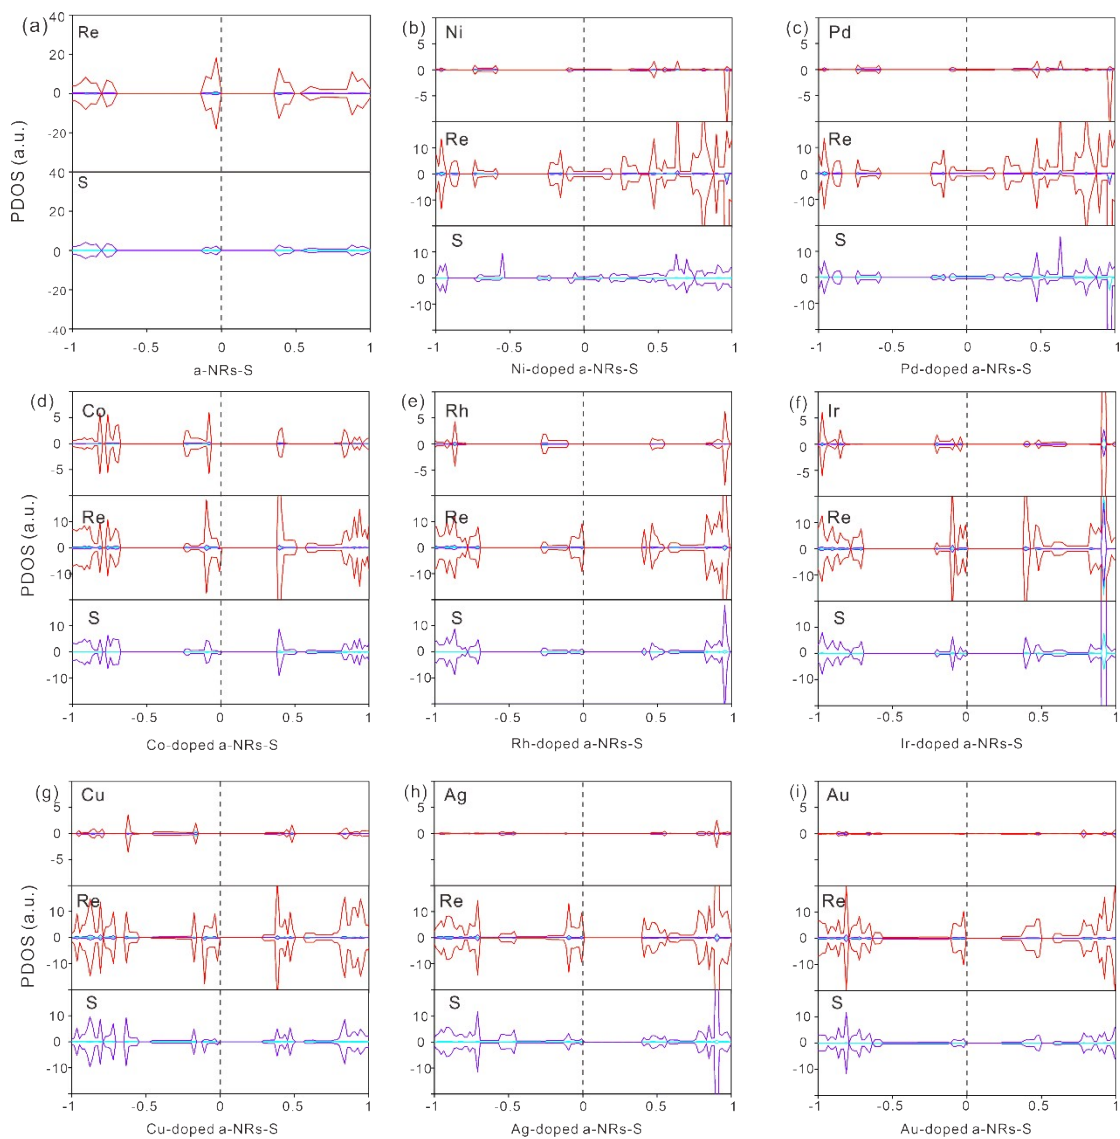

**Figure S7** The partial density of states on specific orbitals in pristine, Ni-, Pd-, Co-, Rh-, Ir-, Cu-, Ag-, and Au-doped a-NRs-S. The symmetric PDOS distributions indicate no magnetism exists in these nanoribbons. The lines blue, purple and red represent s, p and d orbitals, respectively.

## 8. The partial density of states in Cr-, Ni-, Pd- and Pt- doped b-NRs-S.

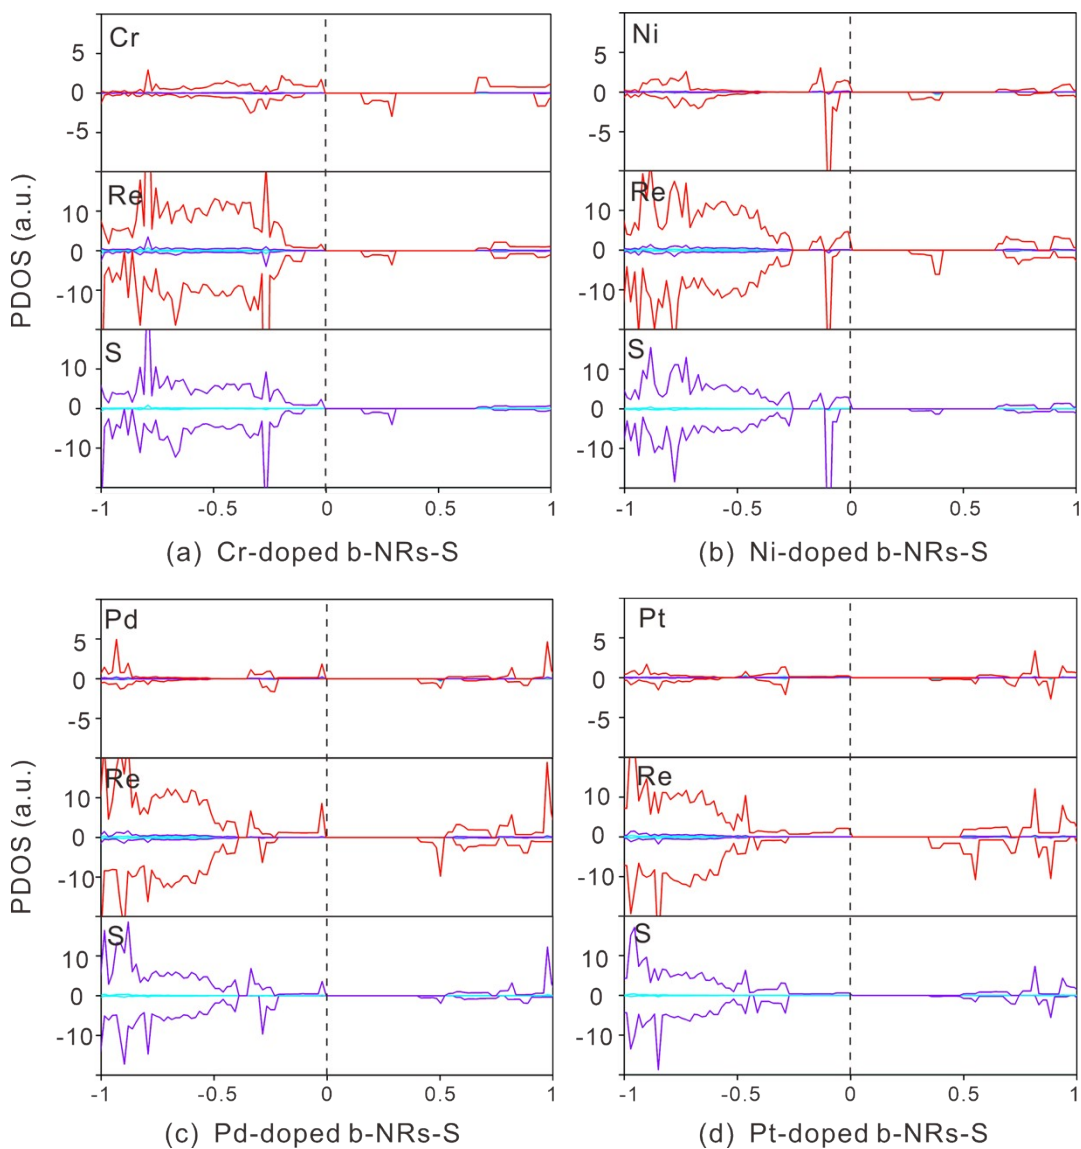

**Figure S8** The partial density of states on specific orbitals in Cr-, Ni-, Pd- and Pt- doped b-NRs-S. The asymmetric PDOS distributions indicate magnetism can be introduced by TM-doping in exists in b-NRs-S. The lines blue, purple and red represent s, p and d orbitals, respectively.

## 9. Bader charge analysis of atoms around doping sites in pristine and TM-doped a-NRs-S nanoribbons.

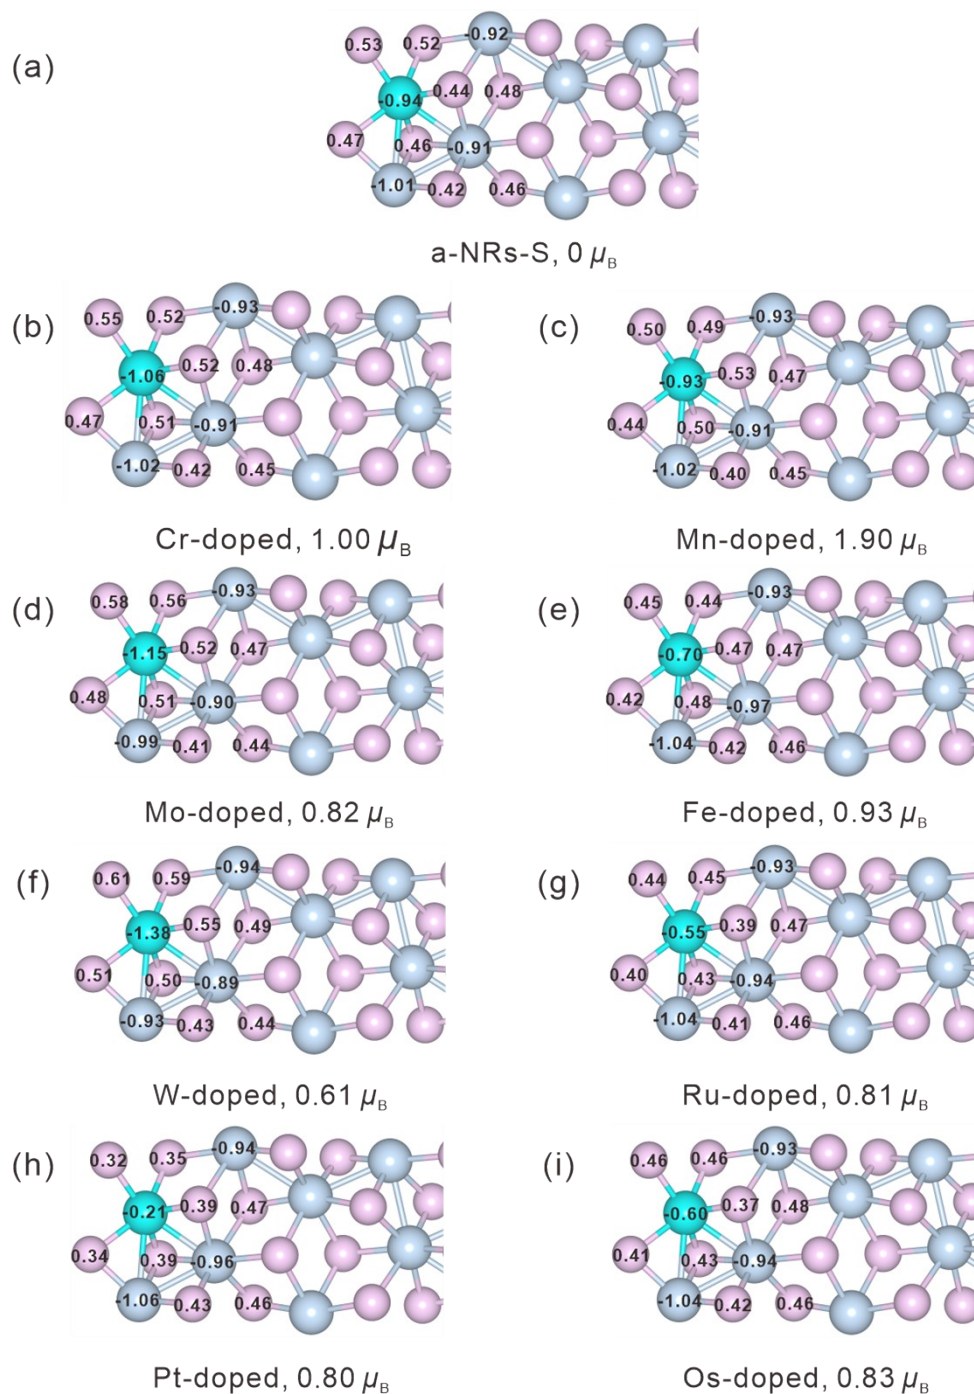

**Figure S9** Bader charge analysis of atoms around doping sites in pristine (a) and (b-i) TM-doped a-NRs-S nanoribbons. The detailed Bader charge of TM atom and atoms around it is presented in each panel. Positive and negative values represent accumulation and deletion of electrons, respectively. The total magnetic moment of the nanoribbon is also listed under each panel.
